# Supplementary material for: A gB/CD3 bispecific BiTE antibody construct for targeting Human Cytomegalovirus-infected cells
Source: PubMed Central journal article supplement (PMC6261951; doi:10.1038/s41598-018-36055-2), 2018-11-28
Supplement: 41598_2018_36055_MOESM1_ESM.pdf [file 41598_2018_36055_MOESM1_ESM.pdf]

# A gB/CD3 bispecific BiTE antibody construct for targeting Human Cytomegalovirus-infected cells

Charlotte U. Brey<sup>1</sup>, Julia Proff<sup>1</sup>, Natascha Teufert<sup>2</sup>, Benjamin Salzer<sup>1</sup>, Johannes Brozy<sup>3</sup>, Markus Münz<sup>3</sup>, Jochen Pendzialek<sup>3</sup>, Armin Ensser<sup>2</sup>, Wolfgang Holter<sup>1,4</sup> and Manfred Lehner<sup>1,4\*</sup>

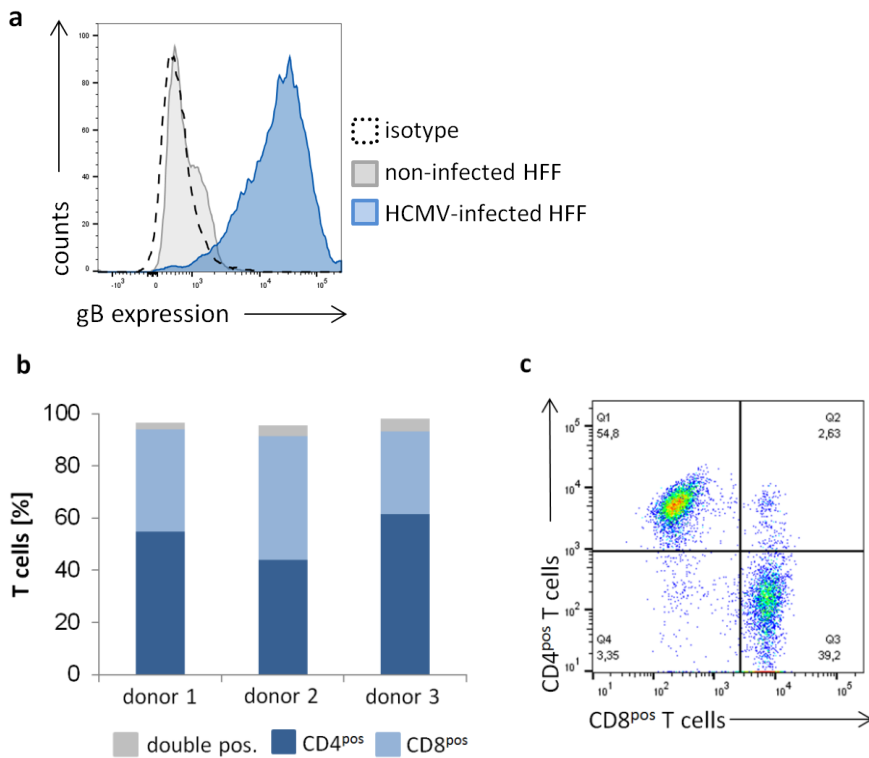

**Supplemental Figure 1:** (a) Expression of gB on the cell surface of HCMV-infected HFF (AD169, MOI 5, day 4 p.i.). Shown is one representative experiment (n=4). (b) Ratio of CD3<sup>pos</sup>/CD4<sup>pos</sup> and CD3<sup>pos</sup>/CD8<sup>pos</sup> T cells (gate was on viable cells) after expansion of negatively selected CD3<sup>pos</sup> cells of 3 different donors with Human T-Activator CD3/CD28 Dynabeads. (c) Representative dot plot of the flow cytometric analysis of the T cell phenotype (gate on CD3<sup>pos</sup> cells).

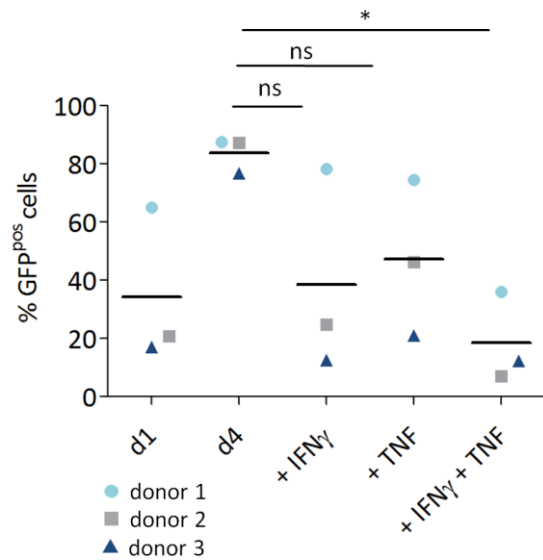

**Supplemental Figure 2:** Inhibition of HCMV replication in HFF by addition of IFN- $\gamma$  (5 ng/ml) and/or TNF (5 ng/ml) during and after infection (AD169, MOI 0.3). The percentage of HCMV-infected HFF was determined by flow cytometric quantification of GFP<sup>pos</sup> cells 4 days after infection.

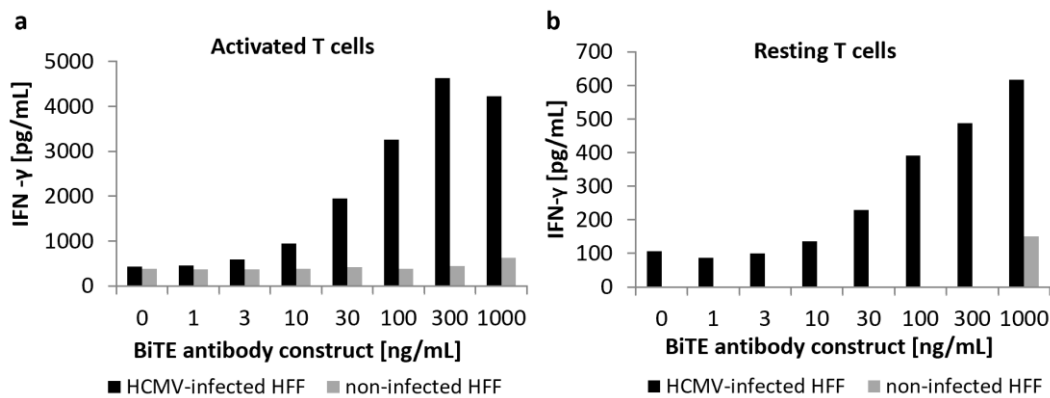

**Supplemental Figure 3:** The diagrams show the concentrations of secreted IFN- $\gamma$  in the supernatants of co-cultures of either CD3/CD28-activated T cells (a) or resting T cells (b) with non-infected or HCMV-infected HFF (AD169, MOI 5, day 4 p.i.) and an increasing amount of gB-BiTE antibody construct, as indicated.

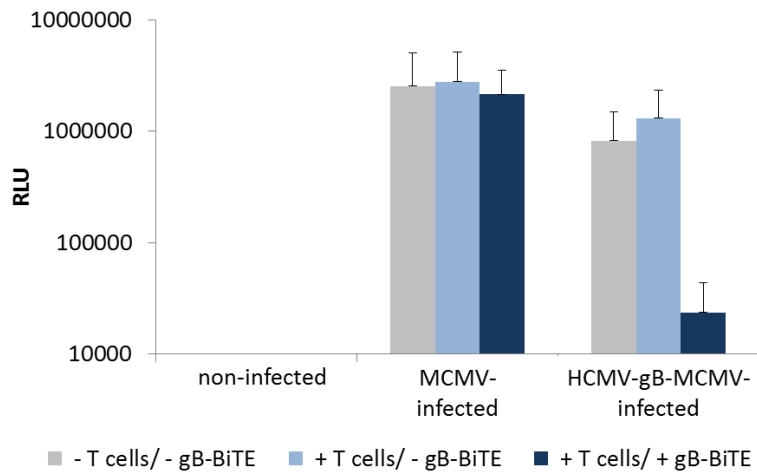

**Supplemental Figure 4:** BiTE antibody construct specific inhibition of a model MCMV recombinant virus *in vitro*. C57/BL6 murine embryonic fibroblasts were infected on d0 with the MCMV strain Smith m157-Luc<sup>54</sup> or a recombinant MCMV variant additionally expressing IE1-HCMV-gB and co-cultured with human CD3/CD28 expanded effector T cells in presence or absence of the gB specific BiTE antibody construct for 24 h. Virus spread in culture was determined by Luciferase-assay as described<sup>54</sup>; mean of 2 experiments (n=3).

## REFERENCES

54. Hebeis BJ, Klenovsek K, Rohwer P, Ritter U, Schneider A, Mach M, et al. Activation of Virus-specific Memory B Cells in the Absence of T Cell Help. *J. Exp. Med.* **199**, 593-602 (2004).
